# Supplementary material for: Age-Related Effects of COVID-19 Pandemic on Mechanical Reperfusion and 30-Day Mortality for STEMI: Results of the ISACS-STEMI COVID-19 Registry
Source: MDPI journal article supplement (doi:10.3390/jcm12062116), 2023-03-08
Supplement: s1 [file s1]

# Supplementary materials

## Table of Contents

|                                      |       |
|--------------------------------------|-------|
| 1. Statistical analysis .....        | p. 2  |
| 1.1 Poisson Regression analysis..... | p. 2  |
| 2. Supplementary Table.....          | p. 3  |
| 3. Supplementary Figures.....        | p. 13 |

## 1. Statistical Analysis

### 1.1. Poisson Regression models

Poisson regression models (with log link function) were applied to compare the Incidence rate of Primary PCI per million of residents per-year in 2020 with the same rate in 2019, correcting for possible impact of risk factors

A first Poisson model assumed the response variable to be the primary PCI count data (per million of residents per-year) in 2020 by Center, including two offset terms to accounts for the different size of the population in the Province where the Center is located, and the primary PCI count data in 2019. In this model, explanatory variables related to risk factors were constructed by aggregating information by Center in 2020, as compared to 2019, and were obtained by percentage ratios (E.g.: percentage of Elderly (>75) in 2020 / percentage of Elderly (>75) in 2019; percentage of Male in 2020 / percentage of Male in 2019; percentage of Hypertension 2020 / percentage of Hypertension in 2019).

To study the incidence rate ratio of primary PCI between 2020 and 2019, in specific subgroups of the populations, such as elderly ( $\geq 75$  years) and young ( $< 75$  years), male and female, or subjects with or without hypertension, Poisson regression used as response variable, the number of primary PCI in 2020 of each subgroup in each Center, and included offsets to account for the different population sizes and the corresponding number in each subgroup in 2019.

Model adequacy and goodness of fit were performed via a residual analysis. Poisson regression was implemented by the R software (version 3.6.2).

## 2. Supplementary Tables

**Table S1.** Characteristics of participating centers.

| <b>Center</b>                                                        | <b>Country</b> | <b>Type Institution</b>            | <b>Total PCI 2019</b> | <b>Total Primary PCI 2019</b> |
|----------------------------------------------------------------------|----------------|------------------------------------|-----------------------|-------------------------------|
| Ospedale degli Infermi, Biella                                       | Italy          | Non Academic<br>Public<br>Hospital | 451                   | 122                           |
| Azienda Ospedaliero-Universitaria<br>"Maggiore della Carità", Novara | Italy          | Academic<br>Public<br>Hospital     | 1076                  | 272                           |
| Azienda Ospedaliero-Universitaria "SS.<br>Annunziata" Sassari        | Italy          | Academic<br>Public<br>Hospital     | 664                   | 179                           |
| Ospedale "San Giovanni di Dio e Ruggi<br>d'Aragona", Salerno         | Italy          | Academic<br>Public<br>Hospital     | 859                   | 220                           |
| Ospedale "A. Manzoni" Lecco                                          | Italy          | Non Academic<br>Public<br>Hospital | 644                   | 141                           |
| Ospedale "Santa Maria delle Grazie",<br>Pozzuoli, Napoli             | Italy          | Non Academic<br>Public<br>Hospital | 730                   | 260                           |
| Ospedale "G. Moscati", Aversa, Caserta                               | Italy          | Non Academic<br>Public<br>Hospital | 557                   | 176                           |
| Ospedale "Santa Maria della<br>Misericordia", Perugia                | Italy          | Academic<br>Public<br>Hospital     | 1213                  | 377                           |
| Ospedale "Santa Chiara", Trento                                      | Italy          | Non Academic<br>Public<br>Hospital | 1033                  | 304                           |

|                                                                                                    |                |                                    |      |     |
|----------------------------------------------------------------------------------------------------|----------------|------------------------------------|------|-----|
| Azienda Ospedaliero - Universitaria<br>"Ospedali Riuniti" Trieste                                  | Italy          | Academic<br>Public<br>Hospital     | 723  | 206 |
| Ospedale "Santa Maria Goretti", Latina                                                             | Italy          | Non Academic<br>Public<br>Hospital | 1057 | 509 |
| Clinica "Villa dei Fiori", Acerra, Napoli                                                          | Italy          | Private<br>Hospital                | 808  | 330 |
| Ospedale "Santa Maria della<br>Misericordia", Udine                                                | Italy          | Academic<br>Public<br>Hospital     | 598  | 240 |
| Bristol Heart Institute, University<br>Hospitals Bristol NHSFT & University of<br>Bristol, Bristol | UK             | Academic<br>Public<br>Hospital     | 2088 | 737 |
| "John Radcliffe" Hospital, Oxford                                                                  | UK             | Academic<br>Public<br>Hospital     | 1261 | 350 |
| University Hospital Brno, Medical Faculty<br>of Masaryk University Brno                            | Czech Republic | Academic<br>Public<br>Hospital     | 1250 | 319 |
| Department of Cardiology, Medical<br>Center Ljubljana, Slovenia                                    | Slovenia       | Academic<br>Public<br>Hospital     | 2114 | 760 |
| Hospital "la Paz", Madrid                                                                          | Spain          | Academic<br>Public<br>Hospital     | 1102 | 341 |
| Hospital "Puerta del Mar", Cadiz                                                                   | Spain          | Academic<br>Public<br>Hospital     | 867  | 163 |
| Complejo Hospitalario de Toledo, Toledo                                                            | Spain          | Academic<br>Public<br>Hospital     | 875  | 289 |

|                                                                     |                 |                              |      |     |
|---------------------------------------------------------------------|-----------------|------------------------------|------|-----|
| University Hospital "Juan Ramón Jiménez", Huelva                    | Spain           | Academic Public Hospital     | 1005 | 296 |
| University Hospital of Wales Cardiff                                | UK              | Academic Public Hospital     | 1823 | 552 |
| Hospital Clínico Universitario "Virgen de la Victoria", Málaga      | Spain           | Academic Public Hospital     | 1421 | 359 |
| Complejo Hospitaliero Universitario La Coruna, La Coruna            | Spain           | Academic Public Hospital     | 1197 | 286 |
| Onze Lieve Vrouwe Gasthuis (OLVG), Amsterdam                        | The Netherlands | Non Academic Public Hospital | 2109 | 242 |
| Radboud University Medical Centre Nijmegen                          | The Netherlands | Academic Public Hospital     | 1687 | 219 |
| Maastricht University Medical Center                                | The Netherlands | Academic Public Hospital     | 751  | 379 |
| Cardiology Maasstad Ziekenhuis, Rotterdam                           | The Netherlands | Non Academic Public Hospital | 1752 | 340 |
| University Hospital Munich, "Ludwig-Maximilians University", Munich | Germany         | Academic Public Hospital     | 741  | 240 |
| Medical University of Silezia, Katowice                             | Poland          | Academic Public Hospital     | 2472 | 568 |
| St-Jan Hospital, Brugge                                             | Belgium         | Non Academic Public Hospital | 1300 | 190 |

|                                                                                               |         |                                    |      |     |
|-----------------------------------------------------------------------------------------------|---------|------------------------------------|------|-----|
| Jessa Ziekenhuis, Hasselt                                                                     | Belgium | Non Academic<br>Public<br>Hospital | 1522 | 189 |
| Groupe Hospitalier Mutualiste de<br>Grenoble                                                  | France  | Private<br>Hospital                | 1346 | 150 |
| CHU Lariboisière, AP-HP, Paris VII<br>University, INSERM UMRS 942                             | France  | Academic<br>Public<br>Hospital     | 1135 | 147 |
| CHU Timone, Marseille, France; Faculté<br>de Médecine, Aix-Marseille Université,<br>Marseille | France  | Academic<br>Public<br>Hospital     | 906  | 215 |
| Center Hospitalier Universitaire de<br>Poitiers, Poitiers, University Hospital                | France  | Academic<br>Public<br>Hospital     | 1768 | 185 |
| Azienda Ospedaliero Universitaria<br>"Ospedali Riuniti", Ancona                               | Italy   | Academic<br>Public<br>Hospital     | 1031 | 331 |
| Ziekenhuis<br>Netwerk Antwerpen (ZNA) Middelheim,<br>Antwerp                                  | Belgium | Non Academic<br>Public<br>Hospital | 1564 | 164 |
| Ospedale "F. Spaziani", Frosinone                                                             | Italy   | Non Academic<br>Public<br>Hospital | 480  | 254 |
| Ospedale "S. Maurizio" Bolzano                                                                | Italy   | Non Academic<br>Public<br>Hospital | 935  | 335 |
| Ospedale "Sant'Anna", Ferrara                                                                 | Italy   | Academic<br>Public<br>Hospital     | 2092 | 495 |
| Ospedale Civico "Arnas", Palermo                                                              | Italy   | Non Academic<br>Public<br>Hospital | 873  | 222 |

|                                                            |                 |                              |      |     |
|------------------------------------------------------------|-----------------|------------------------------|------|-----|
| Azienda Ospedaliera "Ospedali Riuniti Marche Nord", Pesaro | Italy           | Non Academic Public Hospital | 1191 | 239 |
| University Hospital, Dijon                                 | France          | Academic Public Hospital     | 1620 | 311 |
| University Hospital, Prague                                | Czech Republic  | Academic Public Hospital     | 982  | 200 |
| Hospital "Cabueñas", Gijon                                 | Spain           | Academic Public Hospital     | 730  | 260 |
| St Antonius Hospital, Nieuwegein                           | The Netherlands | Non Academic Public Hospital | 1899 | 398 |
| University Central Hospital, Helsinki                      | Finland         | Academic Public Hospital     | 1795 | 477 |
| Hospital Clinico Universitario, Valencia                   | Spain           | Academic Public Hospital     | 684  | 178 |
| Hospital Germans Triasi Pujol, Badalona                    | Spain           | Academic Public Hospital     | 1003 | 375 |
| Hospital Universitario de Canarias, Santa Cruz de Tenerife | Spain           | Academic Public Hospital     | 539  | 176 |
| University Hospital, Oulu                                  | Finland         | Academic Public Hospital     | 1095 | 165 |
| H. Universitario y Politécnico "La Fe", Valencia           | Spain           | Academic Public Hospital     | 872  | 376 |

|                                                                                |                 |                                    |      |     |
|--------------------------------------------------------------------------------|-----------------|------------------------------------|------|-----|
| Ospedale Maggiore Bologna                                                      | Italy           | Non Academic<br>Public<br>Hospital | 1119 | 342 |
| AUSL-IRCCS Reggio Emilia                                                       | Italy           | Non Academic<br>Public<br>Hospital | 822  | 271 |
| Clinical and Experimental Interventional<br>Cardiology, University of Saarland | Germany         | Academic<br>Public<br>Hospital     | 931  | 210 |
| Ospedale "del Mare", Napoli                                                    | Italy           | Non Academic<br>Public<br>Hospital | 1206 | 486 |
| UMC Utrecht                                                                    | The Netherlands | Academic<br>Public<br>Hospital     | 1450 | 275 |
| Hospital "Puerta de Hierro",<br>Majadahonda                                    | Spain           | Academic<br>Public<br>Hospital     | 777  | 156 |
| Central Hospital of Medical University,<br>Lodz                                | Poland          | Academic<br>Public<br>Hospital     | 933  | 189 |
| Azienda Ospedaliera Sanitaria, Parma                                           | Italy           | Academic<br>Public<br>Hospital     | 667  | 203 |
| Universitets Hospital, Odense                                                  | Danemark        | Academic<br>Public<br>Hospital     | 2274 | 629 |
| Northwest Clinics, Alkmaar                                                     | The Netherlands | Non Academic<br>Public<br>Hospital | 1561 | 339 |
| Heart Disease Institute, Hospital<br>Universitari de Bellvitge Barcelona       | Spain           | Academic<br>Public<br>Hospital     | 1787 | 510 |



|                                                                                                 |                 |                              |      |     |
|-------------------------------------------------------------------------------------------------|-----------------|------------------------------|------|-----|
| State Research Institute for Complex Issues of Cardiovascular Diseases, Kemerovo                | Russia          | Academic Public Hospital     | 3200 | 540 |
| Department of Cardiology, Medisch Spectrum, Enschede                                            | The Netherlands | Non Academic Public Hospital | 1659 | 458 |
| University Clinic for Cardiology, Medical Faculty, "Ss' Cyril and Methodius" University, Skopje | Macedonia       | Academic Public Hospital     | 2800 | 840 |
| Center for Cardiovascular Diseases, Ohrid                                                       | Macedonia       | Private Hospital             | 679  | 361 |
| Hospital de Santa Cruz, CHLO - Carnaxide, Portugal                                              | Portugal        | Academic Public Hospital     | 943  | 201 |
| Ospedali Riuniti, Reggio Calabria                                                               | Italy           | Non Academic Public Hospital | 934  | 283 |
| Clinic Emergency Hospital, Bucharest                                                            | Romania         | Academic Public Hospital     | 1350 | 750 |
| Attikon University Hospital, Athens,                                                            | Greece          | Academic Public Hospital     | 547  | 190 |
| University Hospital, Birmingham                                                                 | UK              | Academic Public Hospital     | 784  | 231 |
| Heart Center, Turku                                                                             | Finland         | Academic Public Hospital     | 1068 | 176 |
| Amphia Hospital, Breda                                                                          | The Netherlands | Non Academic Public Hospital | 2069 | 885 |

|                                                                                 |                |                              |       |      |
|---------------------------------------------------------------------------------|----------------|------------------------------|-------|------|
| Invasive Cardiology and Congenital Heart Disease<br>University Hospital, Patras | Greece         | Academic Public Hospital     | 960   | 389  |
| Homolka Hospital, Prague                                                        | Czech Republic | Non Academic Public Hospital | 855   | 200  |
| Otamendi Hospital, Buenos Aires, Argentina                                      | Argentina      | Private Hospital             | 1008  | 120  |
| University Hospital Centre, University of Zagreb, Zagreb, Croatia               | Croatia        | Academic Public Hospital     | 1200  | 400  |
| Instituto Cardiovascular de Buenos Aires, Buenos Aires, Argentina               | Argentina      | Private Hospital             | 1955  | 178  |
| Center Hospitalier Universitaire de Lille, Lille, France                        | France         | Academic Public Hospital     | 1097  | 150  |
| Cardiology Institute, Instambul University, Instambul, Turkey                   | Turkey         | Academic Public Hospital     | 980,0 | 180  |
| Eskisehir Osmangazi University, Faculty of Medicine, Eskisehir, Turkey          | Turkey         | Academic Public Hospital     | 950   | 150  |
| Tyumen Cardiology Research Center, Tyumen Russia                                | Russia         | Academic Public Hospital     | 905   | 150  |
| Universidad UPB, Universidad CES. Medellin, Columbia                            | Columbia       | Academic Public Hospital     | 850,0 | 145  |
| Instituto de Cardiologia Integral, Montevideo                                   | Uruguay        | Private Hospital             | 566   | 160  |
| Assiut University, Assiut                                                       | Egypt          | Academic Public Hospital     | 2520  | 1006 |

|                                                                                                |           |                                |      |      |
|------------------------------------------------------------------------------------------------|-----------|--------------------------------|------|------|
| National University Hospital, Singapore                                                        | Singapore | Academic<br>Public<br>Hospital | 1607 | 520  |
| Queen Mary Hospital, University of Hong Kong,                                                  | HongKong  | Academic<br>Public<br>Hospital | 756  | 128  |
| Queen Elizabeth Hospital, University of Hong Kong                                              | HongKong  | Academic<br>Public<br>Hospital | 1261 | 322  |
| University of Indonesia National Cardiovascular Center "Harapan Kita", Jakarta                 | Indonesia | Academic<br>Public<br>Hospital | 1185 | 557  |
| Instituto de Cardiología de Corrientes "Juana F. Cabral, Corrientes                            | Argentina | Academic<br>Public<br>Hospital | 1058 | 134  |
| National Heart Center, Singapore                                                               | Singapore | Academic<br>Public<br>Hospital | 2910 | 495  |
| Bursa Sehir Hospital, Bursa                                                                    | Turkey    | Academic<br>Public<br>Hospital | 3500 | 1570 |
| Pelita Harapan University and Heart center Siloam Hospital Lippo Village, Tangerang, Indonesia | Indonesia | Academic<br>Public<br>Hospital | 487  | 130  |
| National Taiwan University Hospital Taipei, Taiwan                                             | Taiwan    | Academic<br>Public<br>Hospital | 1586 | 177  |
| Hospital of Antibes Juan Les Pins, Antibes                                                     | France    | Academic<br>Public<br>Hospital | 858  | 268  |
| Instituto Nacional de Cirugía Cardíaca. Montevideo, Uruguay                                    | Uruguay   | Private<br>Hospital            | 609  | 131  |

|                                                                        |           |                                    |      |     |
|------------------------------------------------------------------------|-----------|------------------------------------|------|-----|
| Alexandra Hospital, Athens, Greece,                                    | Greece    | Academic<br>Public<br>Hospital     | 579  | 207 |
| Kontantopoulion Hospital, Athens,<br>Greece                            | Greece    | Non Academic<br>Public<br>Hospital | 662  | 178 |
| Instituto de cardiologia do Rio Grande do<br>Sul, Porto Alegre         | Brasil    | Private<br>Hospital                | 3673 | 442 |
| Hospital de Santo António, Porto                                       | Portugal  | Academic<br>Public<br>Hospital     | 769  | 244 |
| Hospital Garcia de Orta, Almada                                        | Portugal  | Non Academic<br>Public<br>Hospital | 659  | 160 |
| Blida University Hospital, Blida                                       | Algeria   | Academic<br>Public<br>Hospital     | 1285 | 164 |
| Iraklion University Hospital, Crete,                                   | Greece    | Academic<br>Public<br>Hospital     | 992  | 132 |
| Instituto de Cardiologia de Santa Catarina<br>Praia Comprida, São José | Brasil    | Academic<br>Public<br>Hospital     | 986  | 272 |
| Centro PROCAPE, Federal University of<br>Pernambuco, Recife            | Brasil    | Academic<br>Public<br>Hospital     | 1576 | 797 |
| Hospital Bezmialem Vakıf University<br>İstanbul                        | Turkey    | Academic<br>Public<br>Hospital     | 1000 | 195 |
| Hospital Cordoba, Cordoba                                              | Argentina | Academic<br>Public<br>Hospital     | 436  | 133 |

### 3. Supplementary Figures

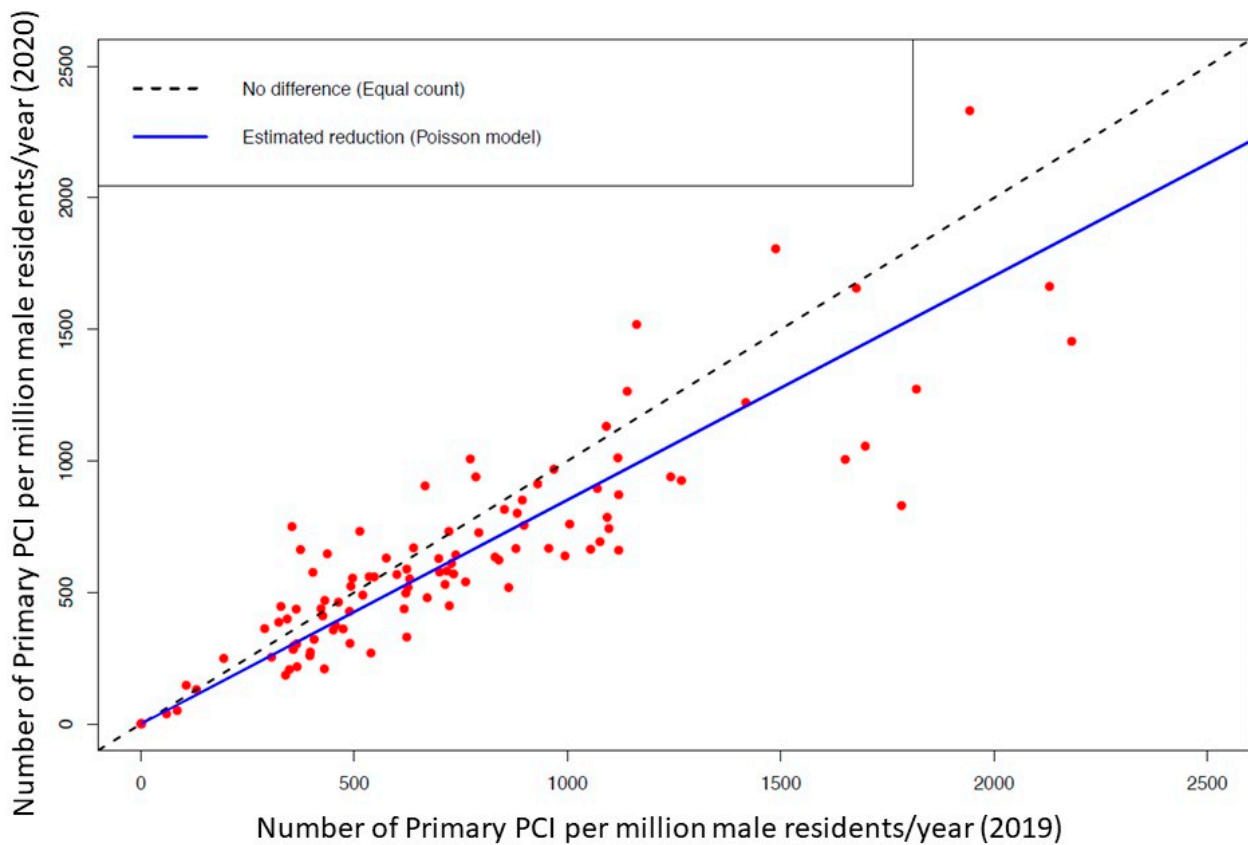

**Figure S1.** This graph shows the results of Poisson regression analysis in the male population to study the relationship between the number of primary PCI per million of male residents/year in 2020 vs the number in 2019.

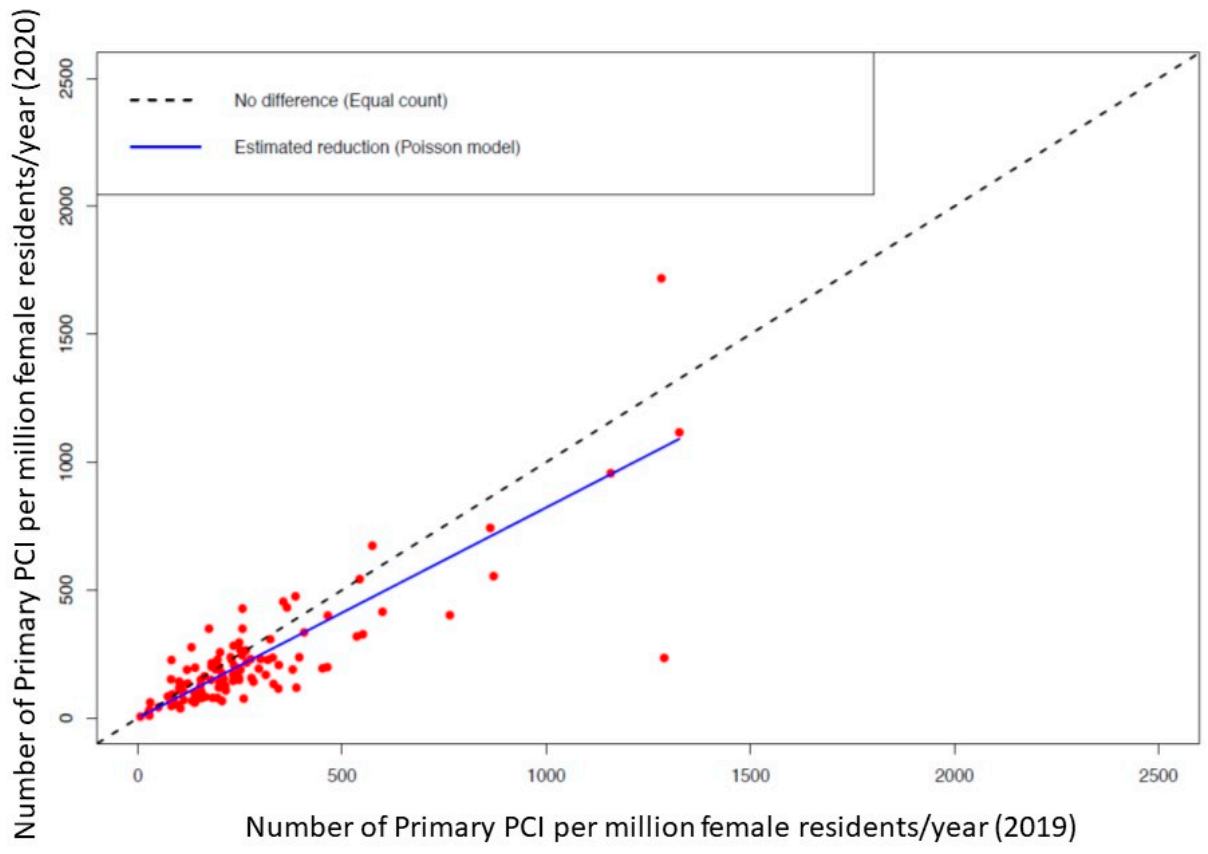

**Figure S2.** This graph shows the results of Poisson regression analysis in the female population to study the relationship between the number of primary PCI per million of female residents/year in 2020 vs the number in 2019.

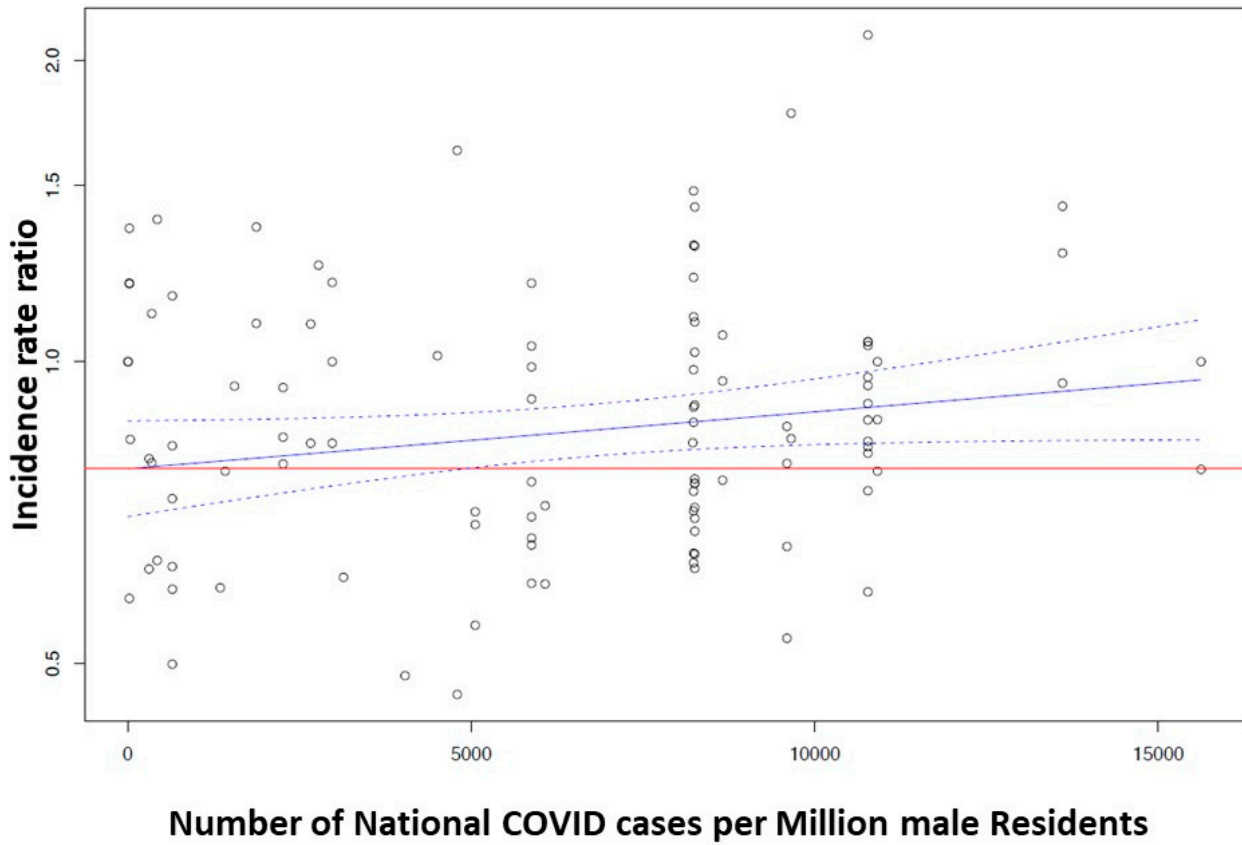

**Figure S3.** This graph shows in the male population the absence of significant relationship between the Incidence Rate Ratio of each centre (on the log-scaled axis) and the number of national Covid-19 cases per million of male residents. Blue lines refer to the predicted values (solid line) from Poisson model, together with 95% prediction intervals (dashed lines). Red line refers to the situation of no Covid-19 effect (intercept term).

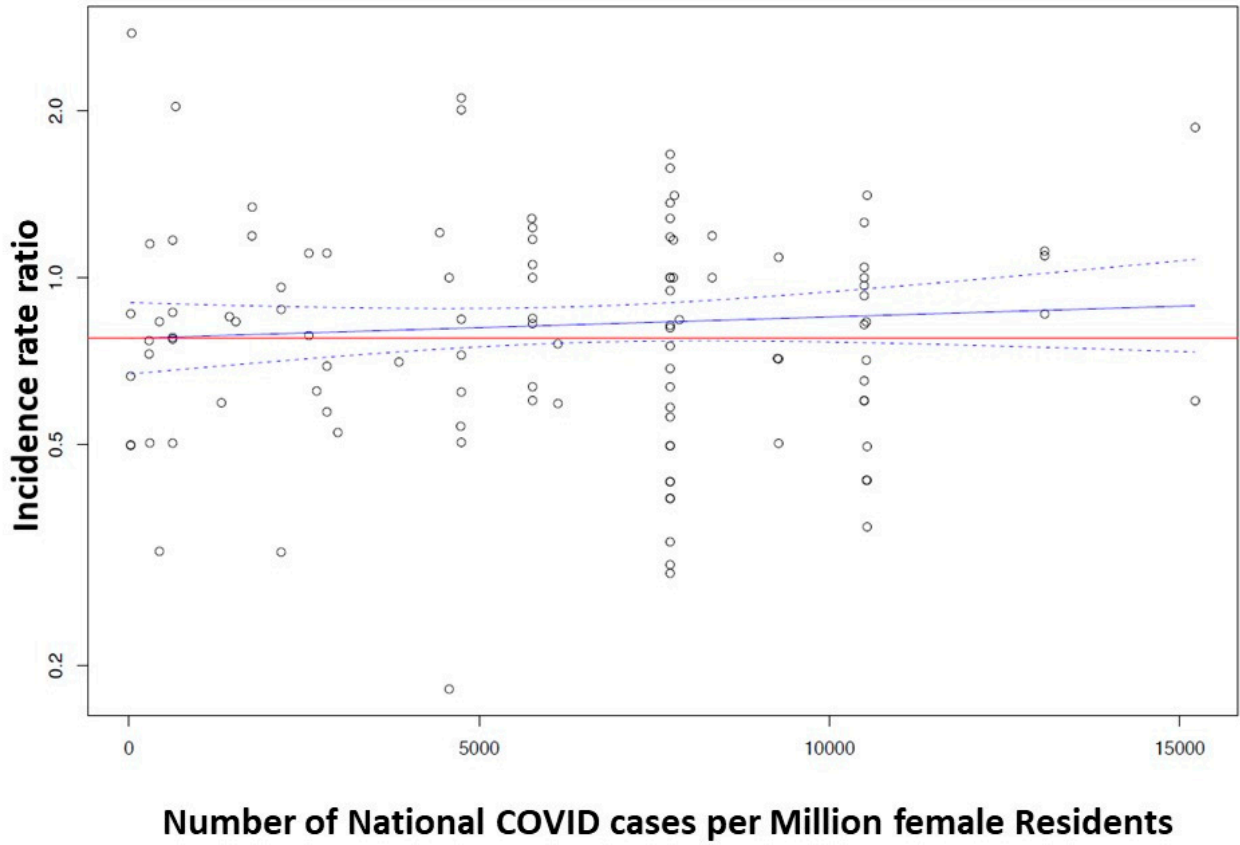

**Figure S4.** This graph shows in the female population the absence of significant relationship between the Incidence Rate Ratio of each centre (on the log-scaled axis) and the number of national Covid-19 cases per million of female residents. Blue lines refer to the predicted values (solid line) from Poisson model, together with 95% prediction intervals (dashed lines). Red line refers to the situation of no Covid-19 effect (intercept term).



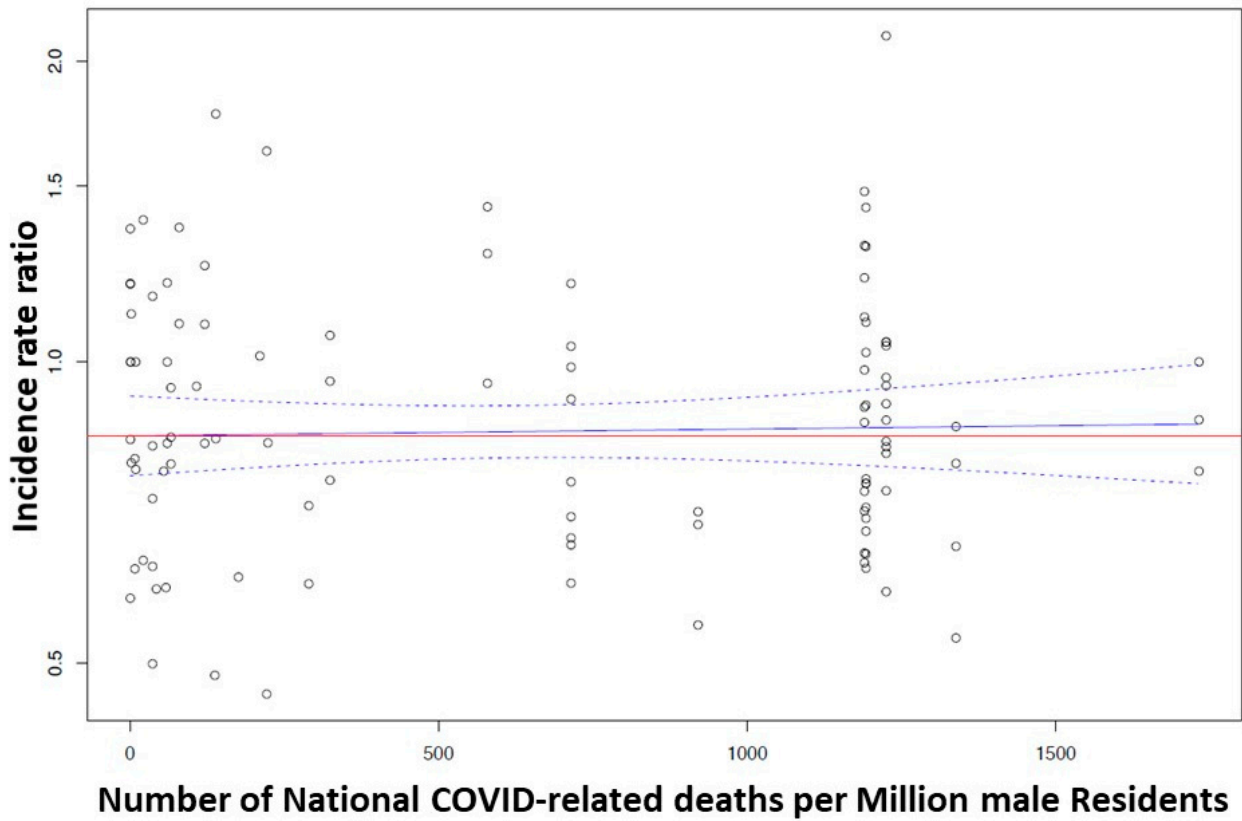

**Figure S5.** This graph shows in the male population the absence of significant relationship between the Incidence Rate Ratio of each centre (on the log-scaled axis) and the number of national Covid-19 related deaths per million of male residents. Blue lines refer to the predicted values (solid line) from Poisson model, together with 95% prediction intervals (dashed lines). Red line refers to the situation of no Covid-19 effect (intercept term).

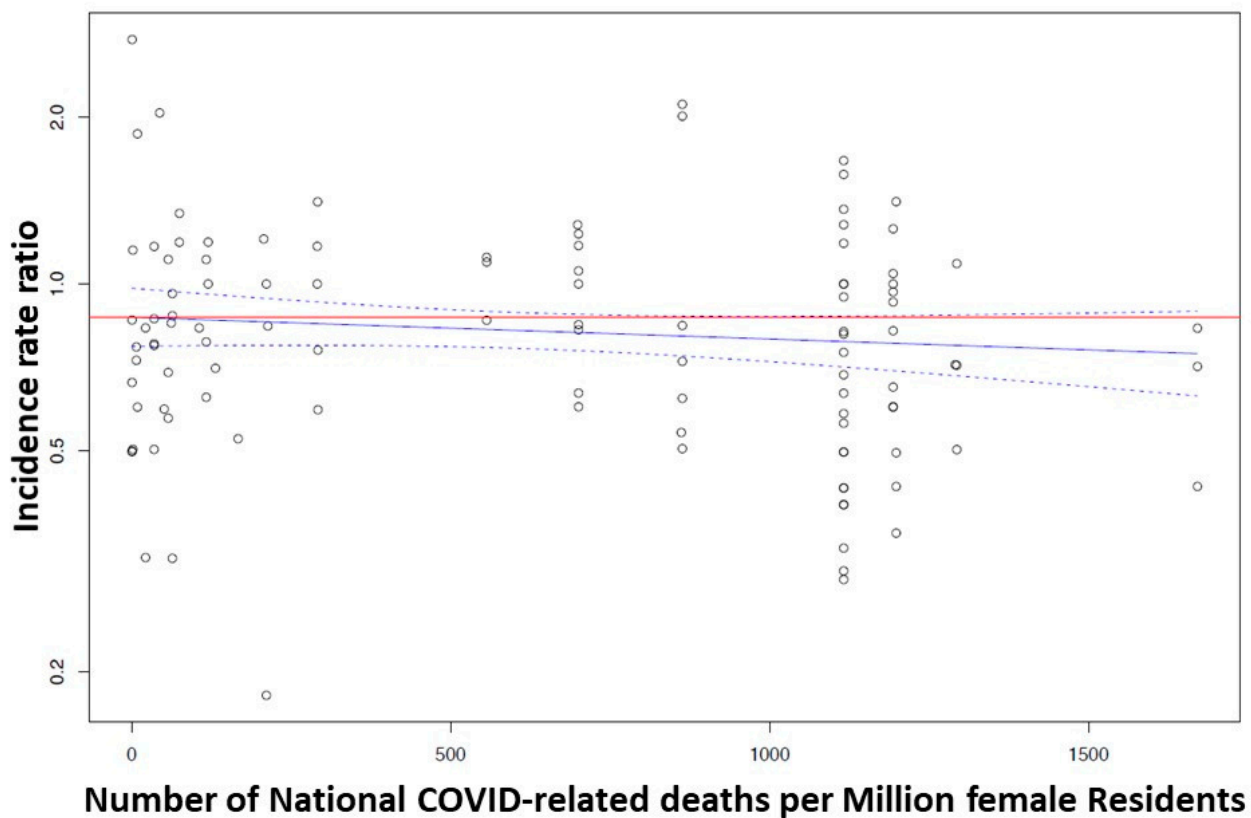

**Figure S6.** This graph shows in the female population the absence of significant relationship between the Incidence Rate Ratio of each centre (on the log-scaled axis) and the number of national Covid-19 related deaths per million of female residents. Blue lines refer to the predicted values (solid line) from Poisson model, together with 95% prediction intervals (dashed lines). Red line refers to the situation of no Covid-19 effect (intercept term).

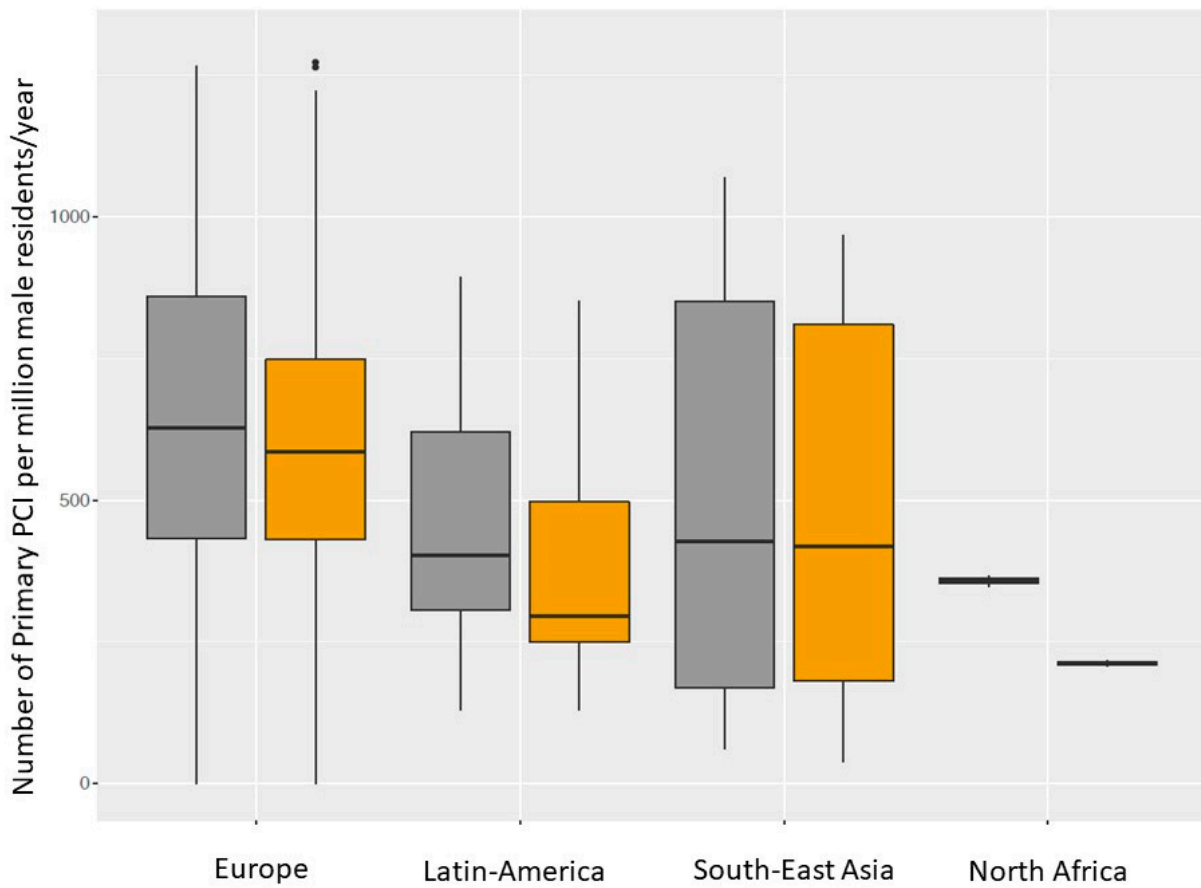

**Figure S7.** Box-and-whisker plot showing the number of male STEMI patients treated by mechanical reperfusion per million of male residents/year in 2019 and 2020 across 4 continents.

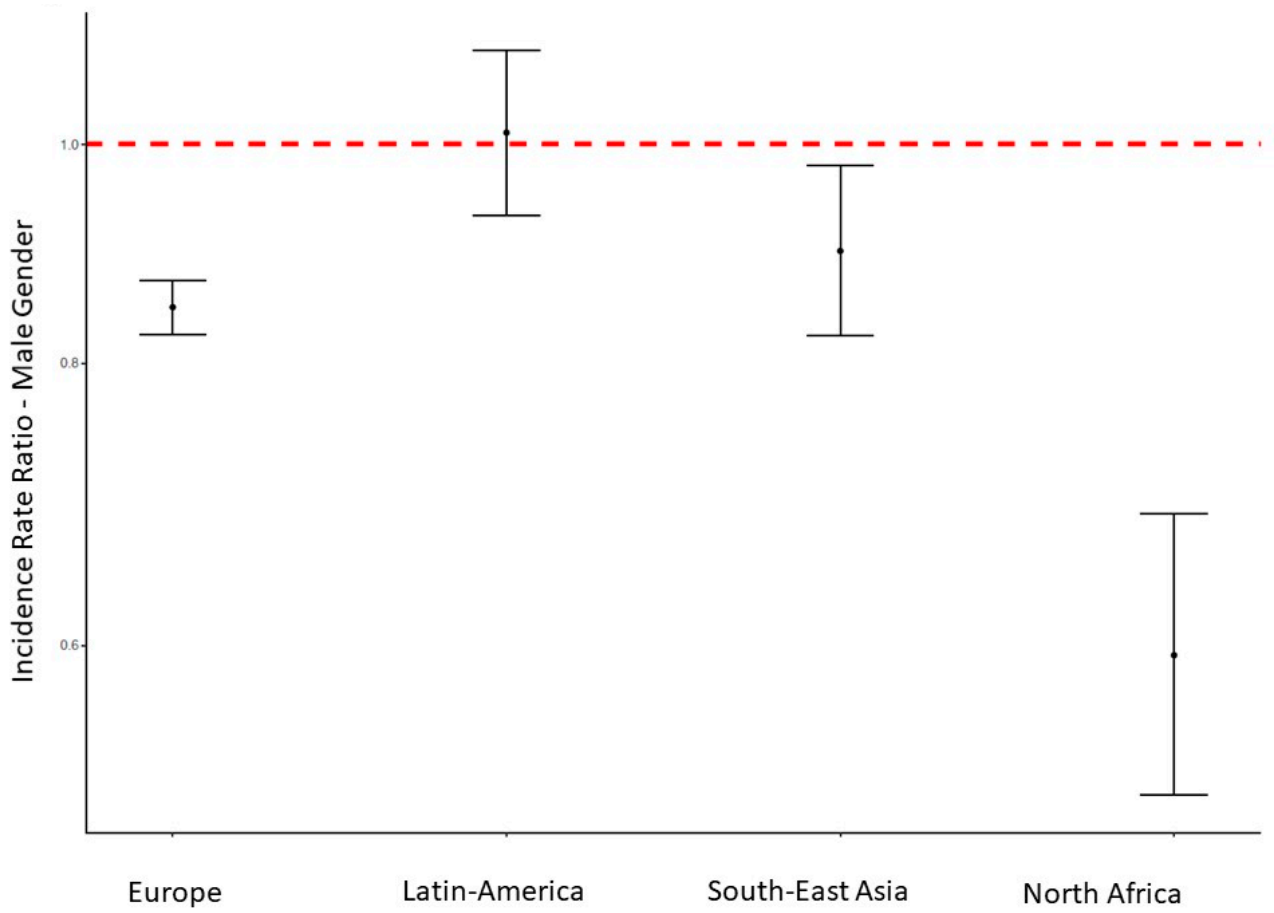

**Figure S8.** Forest plots of the incidence rate ratio in the male population on the log-scaled axis with 95% confidence interval across each continent (1: Europe, 2: Latin America, 3: South East Asia, 4: North Africa).

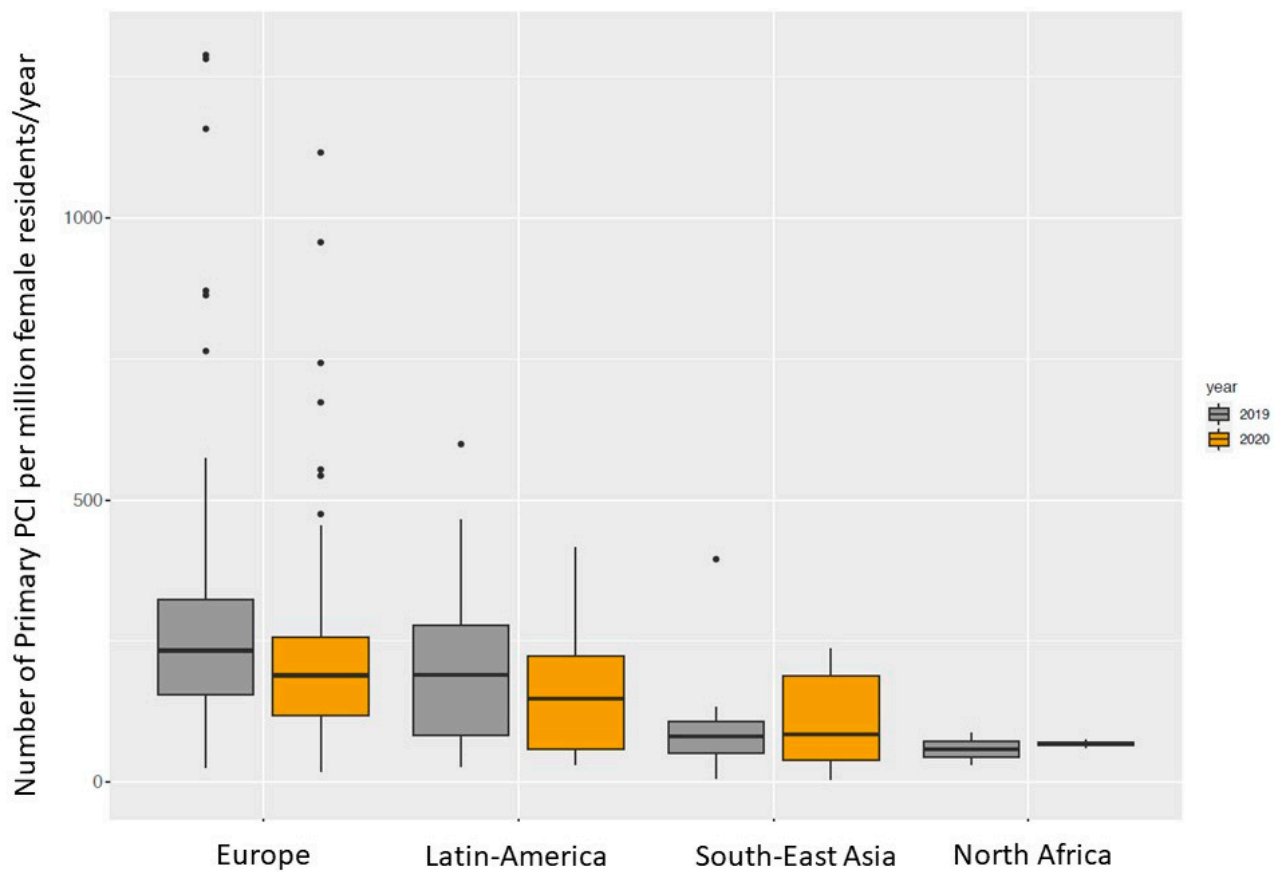

**Figure S9.** Box-and-whisker plot showing the number of female STEMI patients treated by mechanical reperfusion per million of female residents/year in 2019 and 2020 across 4 continents.

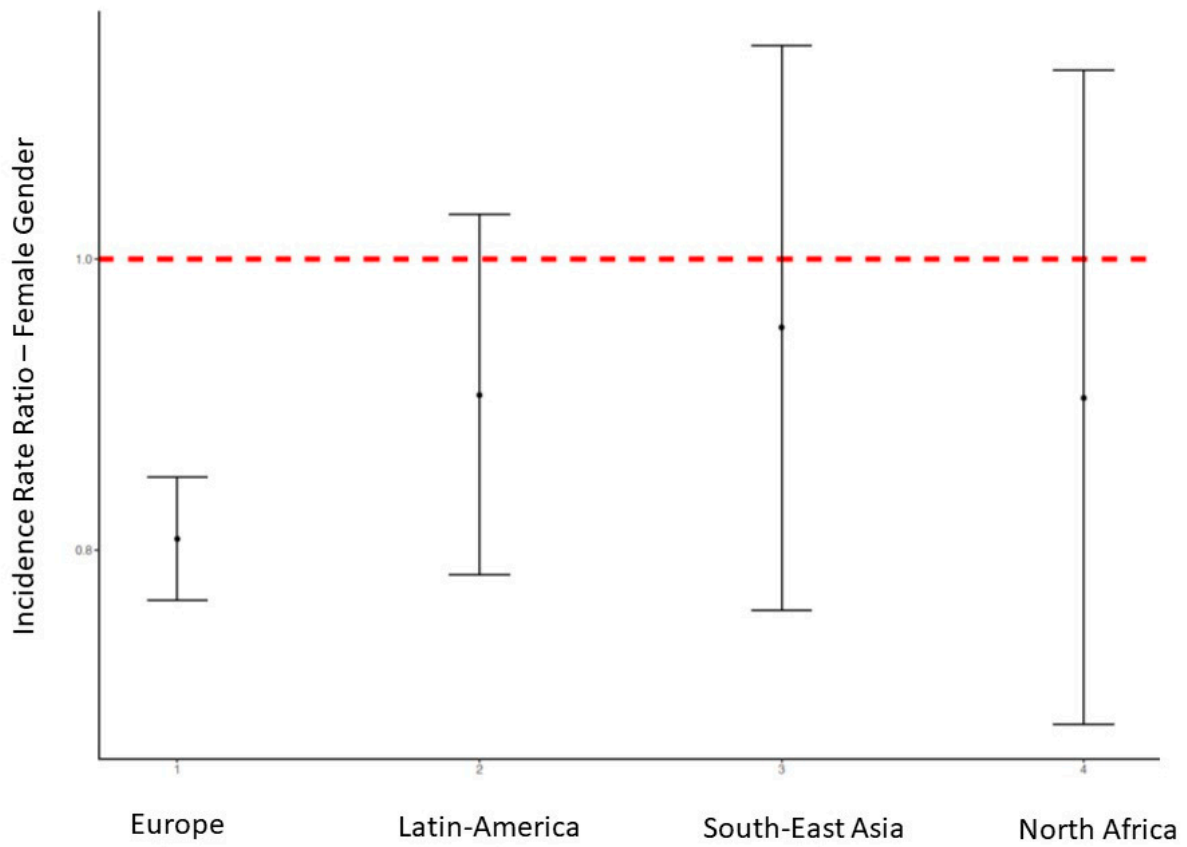

**Figure S10.** Forest plots of the incidence rate ratio in the female population on the log-scaled axis with 95% confidence interval across each continent (1: Europe, 2: Latin America, 3: South East Asia, 4: North Africa).

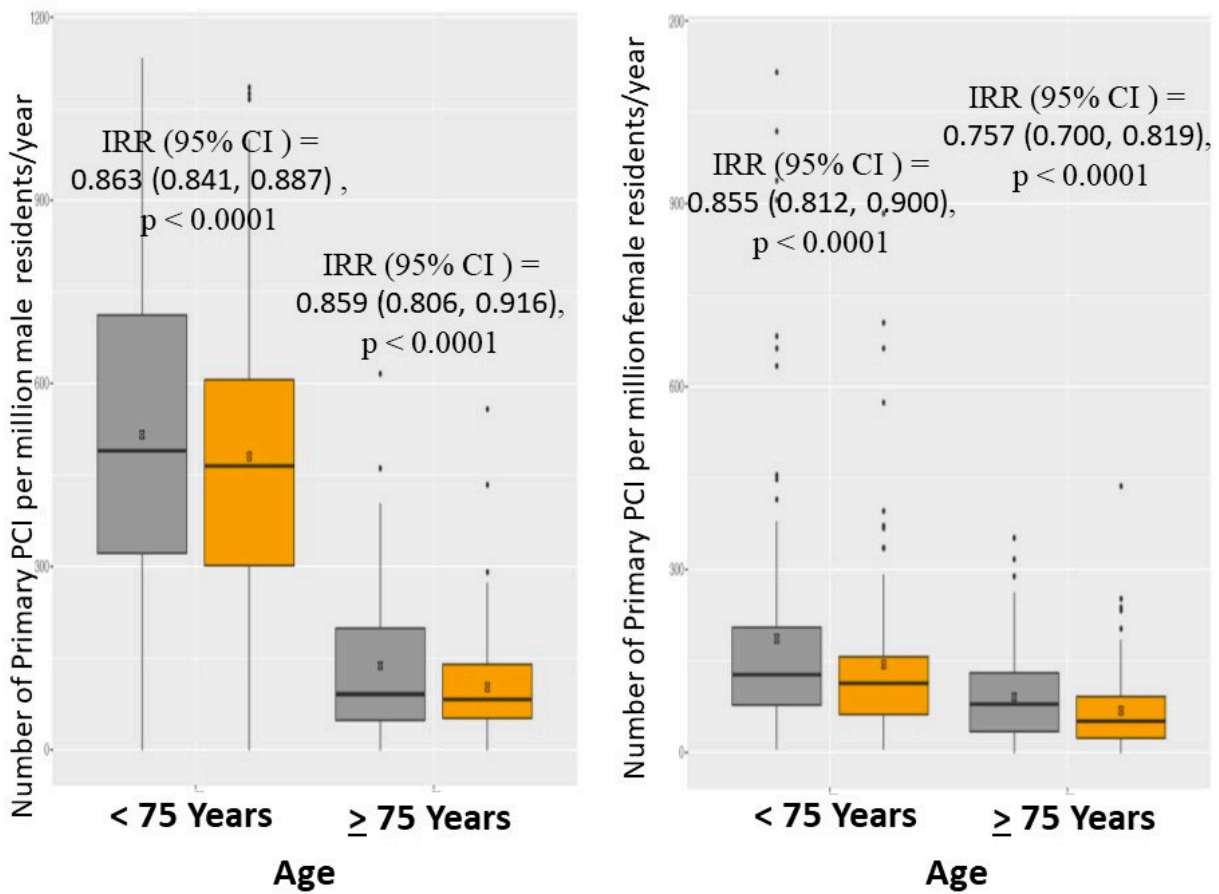

**Figure S11.** Box-and-whisker plot showing the number of male STEMI patients treated by mechanical reperfusion per million of male residents/year in 2019 and 2020 (left graph) and the number of female STEMI patients treated by mechanical reperfusion per million of female residents/year in 2019 and 2020 (right graph) according to age ( $\geq$  or  $<$  75 years).

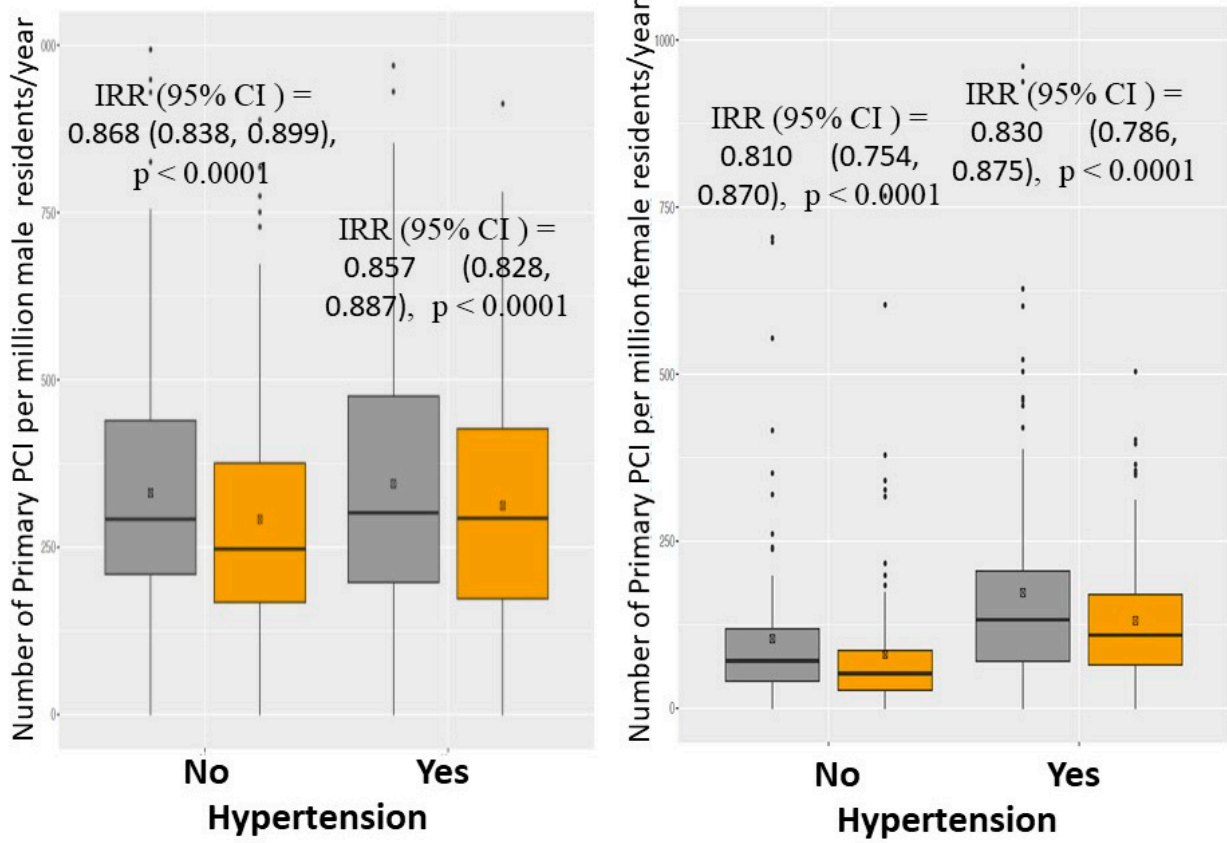

**Figure S12.** Box-and-whisker plot showing the number of male STEMI patients treated by mechanical reperfusion per million of male residents/year in 2019 and 2020 (left graph) and the number of female STEMI patients treated by mechanical reperfusion per million of female residents/year in 2019 and 2020 (right graph) according to hypertension.



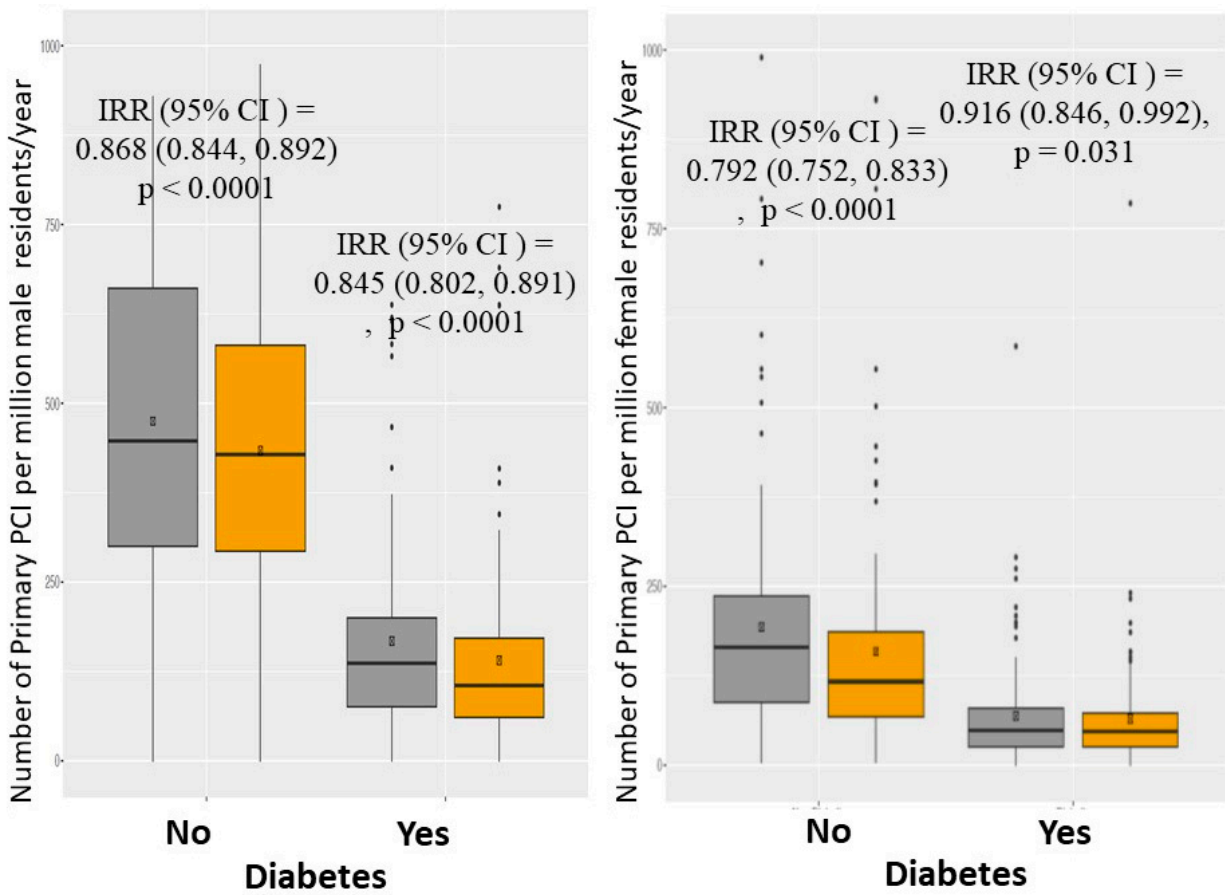

**Figure S13.** Box-and-whisker plot showing the number of male STEMI patients treated by mechanical reperfusion per million of male residents/year in 2019 and 2020 (left graph) and the number of female STEMI patients treated by mechanical reperfusion per million of female residents/year in 2019 and 2020 (right graph) according to diabetes.

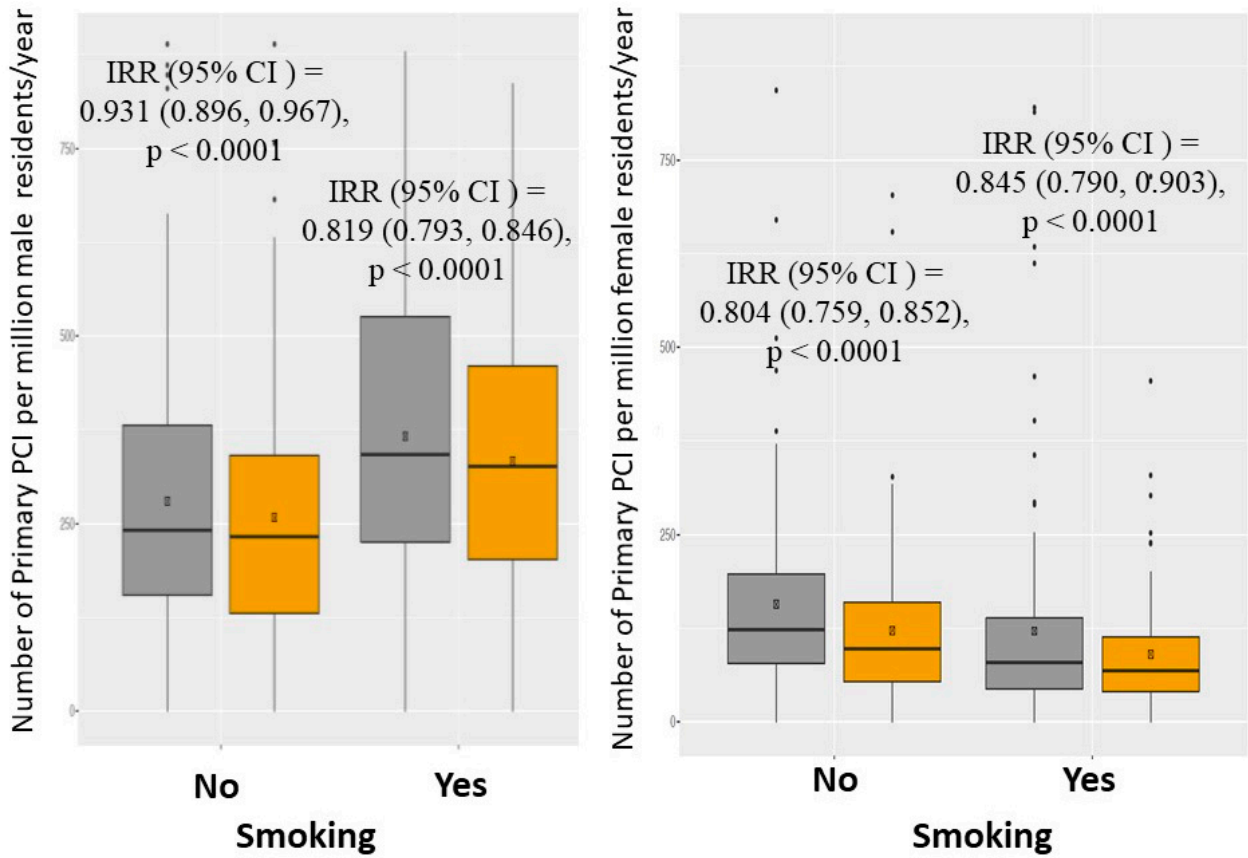

**Figure S14.** Box-and-whisker plot showing the number of male STEMI patients treated by mechanical reperfusion per million of male residents/year in 2019 and 2020 (left graph) and the number of female STEMI patients treated by mechanical reperfusion per million of female residents/year in 2019 and 2020 (right graph) according to smoking.

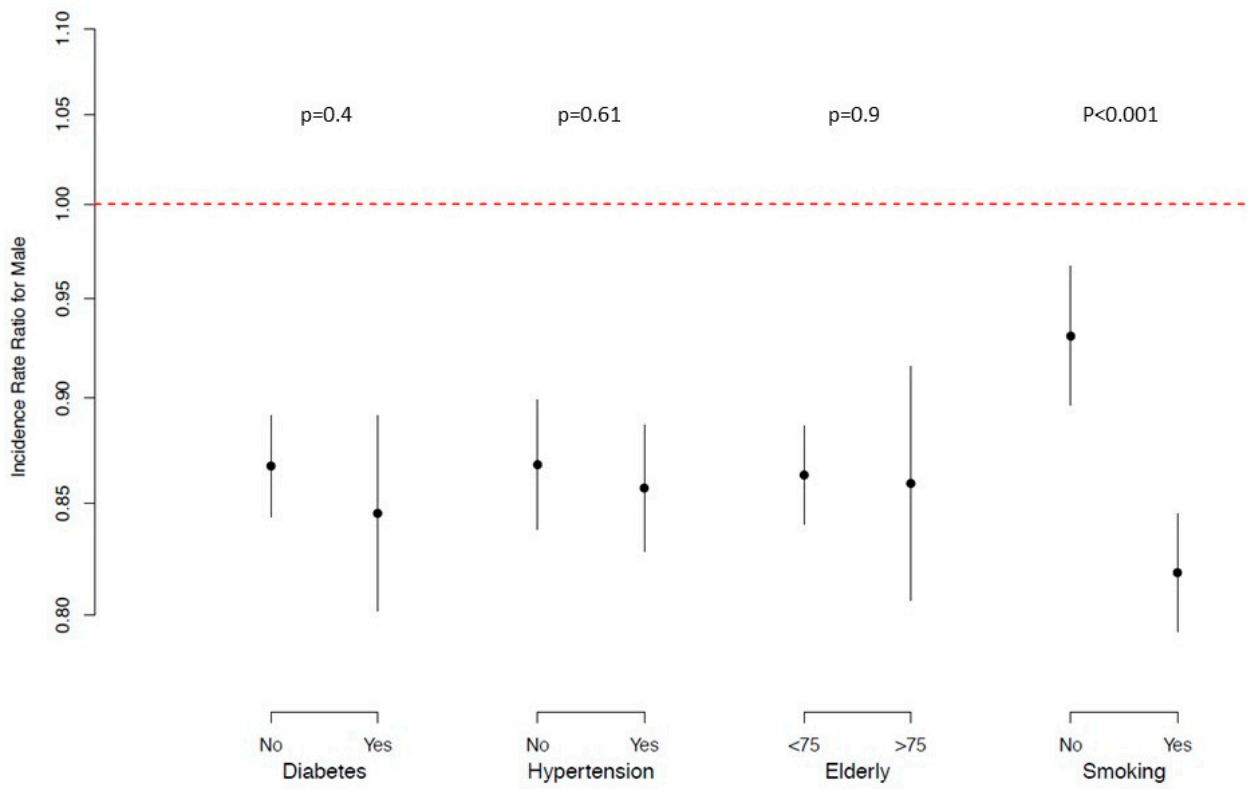

**Figure S15.** Forest plots of the incidence rate ratio in the male population on the log-scaled axis with 95% confidence interval according to major risk factors (Diabetes, Hypertension, Age and Smoking).

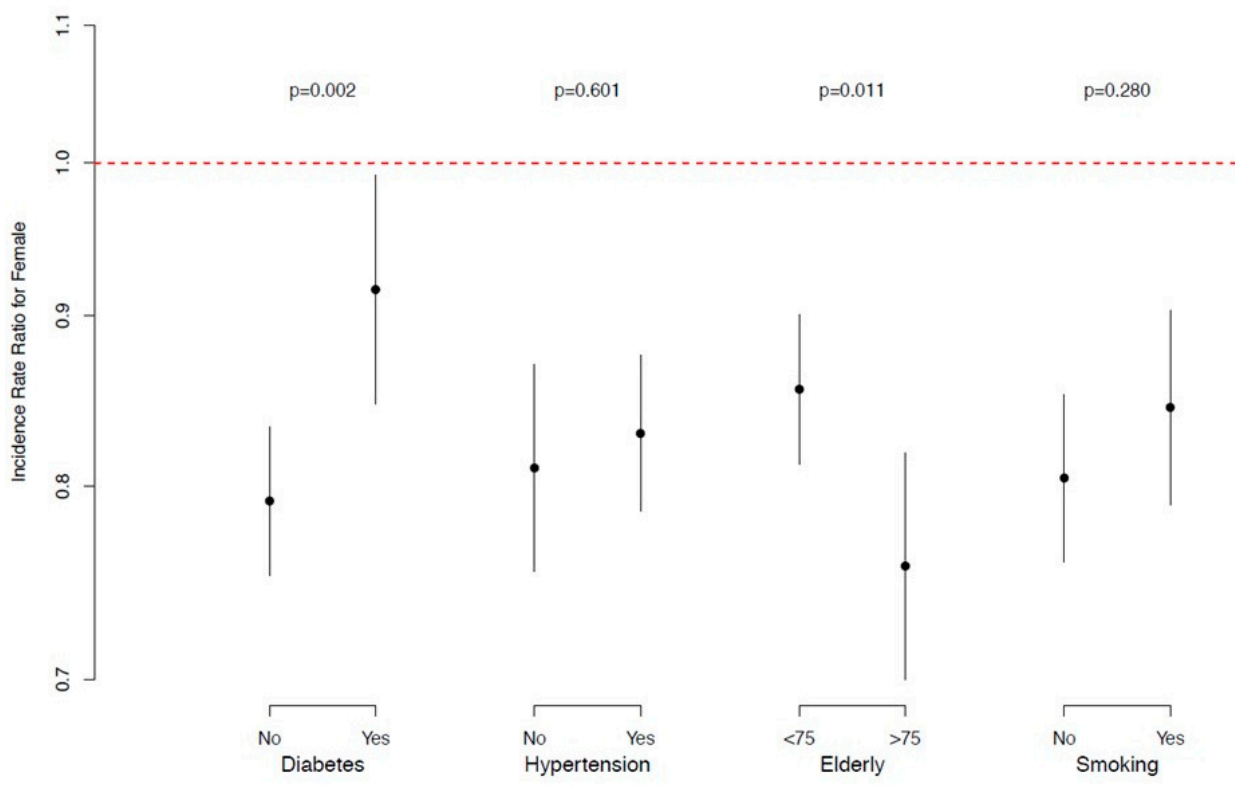

**Figure S16.** Forest plots of the incidence rate ratio in the female population on the log-scaled axis with 95% confidence interval according to major risk factors (Diabetes, Hypertension, Age and Smoking).
